# Supplementary material for: Should sports and exercise medicine be taught in the Swiss undergraduate medical curricula? A survey among 1764 Swiss medical students
Source: PubMed Central journal article supplement — BMJ Open Sport Exerc Med. 2019 Aug 12;5(1):e000575. doi: 10.1136/bmjsem-2019-000575 (PMC6733322; doi:10.1136/bmjsem-2019-000575), 2019-08-12
Supplement: bmjsem-2019-000575supp001.pdf [file bmjsem-2019-000575supp001.pdf]

| University | Mandatory course                                    | Lecturer                  | Year of study   | Duration       | Reason for not included it |
|------------|-----------------------------------------------------|---------------------------|-----------------|----------------|----------------------------|
| Basel      | Introduction to exercise physiology                 | Physiologist              | 2 <sup>nd</sup> | 2 x 45 minutes | A, B                       |
|            | Workshop: cardiovascular adaptation to exercise     | Physiologist              | 2 <sup>nd</sup> | 1 x 45 minutes | A, B                       |
|            | Workshop: cardiac exercise stress testing           | Physiologist              | 2 <sup>nd</sup> | 1 x 45 minutes | A, B                       |
|            | Altitude medicine                                   | Physiologist              | 2 <sup>nd</sup> | 1 x 45 minutes | A, B                       |
|            | Scuba diving medicine                               | Scuba diving doctor       | 2 <sup>nd</sup> | 1 x 45 minutes | A, B                       |
|            | Lifestyle: physical activity from young to old age  | Epidemiologist            | 3 <sup>rd</sup> | 1 x 45 minutes | B                          |
|            | Sports injury in adults and children                | Orthopedic surgeon        | 4 <sup>th</sup> | 1 x 45 minutes | B                          |
| Bern       | Exercise physiology from a researcher point of view | SEM doctor & physiologist | 1 <sup>st</sup> | 1 x 45 minutes | A                          |
|            | Exercise-induced skeletal muscle remodeling         | SEM doctor & physiologist | 2 <sup>nd</sup> | 1 x 45 minutes | A                          |
|            | Altitude physiology                                 | Pulmonologist             | 2 <sup>nd</sup> | 1 x 45 minutes | A, B                       |
| Fribourg   | Altitude physiology and pathophysiology             | Cardiologist              | 2 <sup>nd</sup> | 2 x 45 minutes | A, B                       |
|            | Scuba diving physiology                             | Cardiologist              | 2 <sup>nd</sup> | 1 x 45 minutes | A, B                       |
| Geneva     |                                                     |                           |                 |                |                            |
| Lausanne   | Ski biomechanics                                    | Biomechanist              | 1 <sup>st</sup> | 1 x 45 minutes | A, B                       |
| Neuchâtel  |                                                     |                           |                 |                |                            |
| ETH Zurich |                                                     |                           |                 |                |                            |
| Zurich     |                                                     |                           |                 |                |                            |

A: does not match at least one key SEM domain of the “syllabus for the medical specialty of sport and exercise medicine” written by the “International Syllabus in Sport and Exercise Medicine Group”

B: is not taught by a SEM specialist as defined in this study
